# Supplementary material for: Diluted aqueous ionic liquid assists the acidic oxidative hydrolysis of water-soluble recalcitrant polysaccharide xanthan through structural deterioration
Source: Royal Society of Chemistry journal article supplement (doi:10.1039/d3gc01487h), 2023-01-01
Supplement: d3gc01487h1.pdf [file d3gc01487h1.pdf]

## Supplementary data

Diluted aqueous ionic liquid assists acidic oxidative hydrolysis of water-soluble recalcitrant polysaccharide xanthan through structural deterioration

Weiming Liu<sup>‡</sup>, Liwei Zhang<sup>‡</sup>, Miao Li, Qian Wang, Jinyun Gu, Xiaoyi Chen, Xiaoyu Guo, Zhimin Yu, Xianzhen Li, Shang Wang\*, Fan Yang\*

School of Biological Engineering, Dalian Polytechnic University, Ganjingziqu, Dalian 116034, PR China

\* Address correspondence to: yang\_fan@dlpu.edu.cn

wangshangedu@foxmail.com

School of Biological Engineering

Dalian Polytechnic University

Ganjingziqu, Dalian 116034, PR China

Tel: +86 411 86318692

Fax: +86 411 86323671

<sup>‡</sup>These authors contributed equally to this work

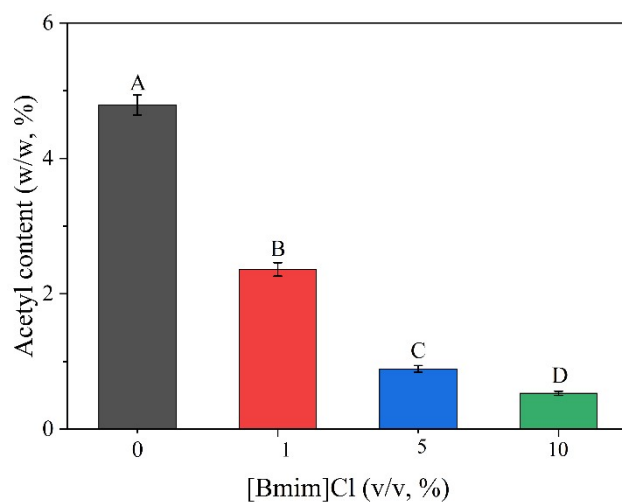

**Fig. S1.** Acetyl content analysis of different XG samples. XG samples were washed with ethanol to remove [Bmim]Cl. Acetyl content of different XG samples were characterized by measuring the absorbance at 540 nm of complexes formed by the reaction of acetyl groups, hydroxylamine, and  $\text{FeCl}_3$ . Different letters represent significant differences ( $P < 0.05$ ).

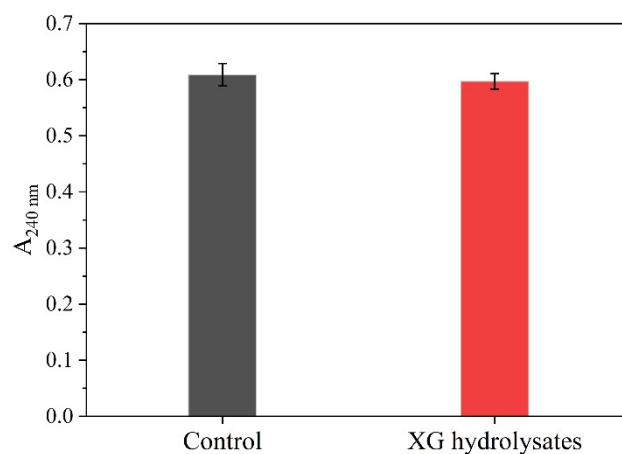

**Fig. S2.** The content of  $\text{H}_2\text{O}_2$  in different XG hydrolysates. XG hydrolysates and control sample were prepared in a system containing 0.4 M HCl, 0.75% (w/v)  $\text{H}_2\text{O}_2$ , and with or without 1% (v/v) [Bmim]Cl at 80 °C for 4 days.

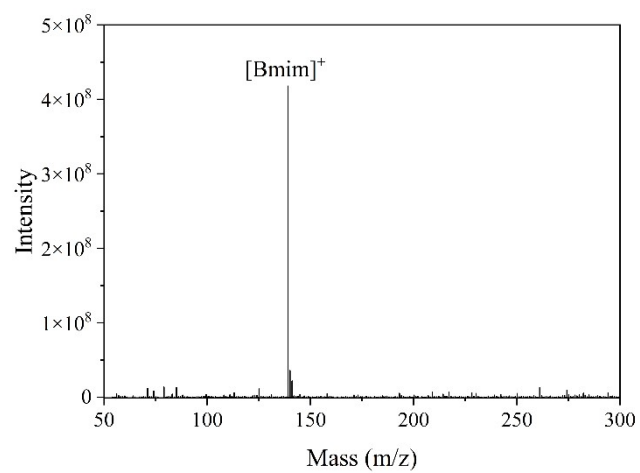

**Fig. S3.** ESI-MS analysis of recovered [Bmim]Cl.

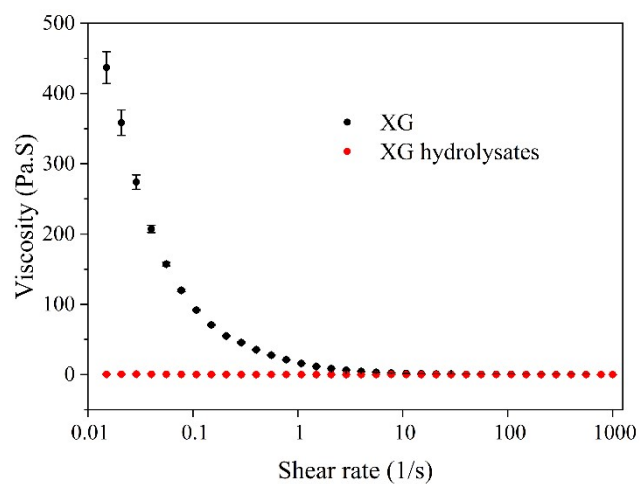

**Fig. S4.** Viscosity analysis of native XG and its hydrolysates. XG hydrolysates were prepared in the system containing 0.4 M HCl, 0.75% (w/v)  $\text{H}_2\text{O}_2$  and 1% (v/v) [Bmim]Cl at 80 °C for 4 days.

**Table S1** Mass balance of XG hydrolysis process

| Component                | Mass (g) | Yield (%) |
|--------------------------|----------|-----------|
| Recovered XG hydrolysate | 1.23     | 24.64     |
| Glucose                  | 0.69     | 13.79     |
| Mannose                  | 0.89     | 17.80     |
| Glucuronic acid          | 1.05     | 20.98     |
| Trisaccharide            | 0.22     | 4.34      |
| Tetrasaccharide          | 0.071    | 1.41      |
| Furfural                 | 0.016    | 0.31      |
| Acetic acid              | 0.0083   | 0.17      |
| Solid residues           | 0.33     | 6.60      |

Yield = Products mass/native XG mass  $\times$  100%

**Table S2** 2D NMR HSQC data of XG hydrolysates

| $\delta(\text{ppm})$ |                 | Assignment                                                                                    |
|----------------------|-----------------|-----------------------------------------------------------------------------------------------|
| $^1\text{H}$         | $^{13}\text{C}$ |                                                                                               |
| 3.1-4.3              | 65-81           | C2/H2, C3/H3, C4/H4 and C5/H5 (COOH) of<br>basic units (glucose, glucuronic acid and mannose) |
| 3.5-4.1              | 60.5            | C6/H6 of glucose and mannose                                                                  |
| 4.5                  | 96.0            | C1/H1 and C6/H6 of glucuronic acid                                                            |
| 4.9                  | 93.5            | C1/H1 of mannose                                                                              |
| 5.1                  | 91.8            | C1/H1 of glucose                                                                              |

**Table S3** Band assignments in FTIR spectra of XG hydrolysates

| Band (cm <sup>-1</sup> ) | Assignment              |
|--------------------------|-------------------------|
| 3417-3421                | O-H stretching          |
| 2926                     | C-H of methyl group     |
| 1728                     | -C=O of acetyl group    |
| 1626-1627                | -C=O of pyruvate group  |
| 1408-1417                | -C-H of methyl group    |
| 1386-1384                | -C-H of methylene group |
| 1258                     | C-O of carbonyl group   |
| 1048-1050                | C-O-C-O-C stretching    |
| 793                      | -C-H of methyl group    |
| 600                      | O-C=O stretching        |



**Table S4** MALDI-TOF MS results for XG hydrolysates.

| Code    | MALDI-TOF Mass (m/z) |                     | Structure                                                            | DP | Code    | MALDI-TOF Mass (m/z) |                     | Structure                                                            | DP |
|---------|----------------------|---------------------|----------------------------------------------------------------------|----|---------|----------------------|---------------------|----------------------------------------------------------------------|----|
| XGOS1   | 527.08               | [M+Na] <sup>+</sup> | Hex <sub>3</sub>                                                     | 3  | XGOS19# | 2604.11              | [M+Na] <sup>+</sup> | Ac <sub>3</sub> Hex <sub>12</sub> HexA <sub>2</sub> Pyr <sub>2</sub> | 14 |
| XGOS2   | 541.06               | [M+Na] <sup>+</sup> | Hex <sub>2</sub> HexA <sub>1</sub>                                   | 3  |         |                      | [M+H] <sup>+</sup>  | Ac <sub>1</sub> Hex <sub>12</sub> HexA <sub>3</sub> Pyr <sub>1</sub> | 15 |
| XGOS3   | 689.13               | [M+Na] <sup>+</sup> | Hex <sub>4</sub>                                                     | 4  |         |                      | [M+H] <sup>+</sup>  | Ac <sub>3</sub> Hex <sub>13</sub> HexA <sub>2</sub>                  | 15 |
| XGOS4   | 703.10               | [M+Na] <sup>+</sup> | Hex <sub>3</sub> HexA <sub>1</sub>                                   | 4  | XGOS20  | 2637.72              | [M+H] <sup>+</sup>  | Ac <sub>4</sub> Hex <sub>11</sub> HexA <sub>3</sub> Pyr <sub>2</sub> | 14 |
| XGOS5   | 851.17               | [M+Na] <sup>+</sup> | Hex <sub>5</sub>                                                     | 5  | XGOS21# | 2701.97              | [M+H] <sup>+</sup>  | Hex <sub>12</sub> HexA <sub>3</sub> Pyr <sub>3</sub>                 | 15 |
| XGOS6   | 865.12               | [M+Na] <sup>+</sup> | Hex <sub>4</sub> HexA <sub>1</sub>                                   | 5  |         |                      | [M+H] <sup>+</sup>  | Ac <sub>5</sub> Hex <sub>12</sub> HexA <sub>3</sub>                  | 15 |
| XGOS7   | 1013.20              | [M+Na] <sup>+</sup> | Hex <sub>6</sub>                                                     | 6  |         |                      | [M+H] <sup>+</sup>  | Ac <sub>2</sub> Hex <sub>13</sub> HexA <sub>2</sub> Pyr <sub>2</sub> | 15 |
| XGOS8   | 1027.13              | [M+Na] <sup>+</sup> | Hex <sub>5</sub> HexA <sub>1</sub>                                   | 6  |         |                      | [M+H] <sup>+</sup>  | Ac <sub>4</sub> Hex <sub>14</sub> HexA <sub>1</sub> Pyr <sub>1</sub> | 15 |
| XGOS9   | 1175.20              | [M+Na] <sup>+</sup> | Hex <sub>7</sub>                                                     | 7  |         |                      | [M+H] <sup>+</sup>  | Ac <sub>6</sub> Hex <sub>15</sub>                                    | 15 |
| XGOS10  | 1247.14              | [M+K] <sup>+</sup>  | Ac <sub>1</sub> Hex <sub>6</sub> HexA <sub>1</sub>                   | 7  | XGOS22# | 2758.18              | [M+H] <sup>+</sup>  | Ac <sub>3</sub> Hex <sub>12</sub> HexA <sub>3</sub> Pyr <sub>2</sub> | 15 |
| XGOS11  | 1409.18              | [M+K] <sup>+</sup>  | Ac <sub>1</sub> Hex <sub>7</sub> HexA <sub>1</sub>                   | 8  |         |                      | [M+H] <sup>+</sup>  | Ac <sub>5</sub> Hex <sub>13</sub> HexA <sub>2</sub> Pyr <sub>1</sub> | 15 |
| XGOS12  | 1571.20              | [M+K] <sup>+</sup>  | Ac <sub>1</sub> Hex <sub>8</sub> HexA <sub>1</sub>                   | 9  | XGOS23# | 2831.18              | [M+K] <sup>+</sup>  | Hex <sub>13</sub> HexA <sub>3</sub> Pyr <sub>2</sub>                 | 15 |
| XGOS13  | 1733.21              | [M+K] <sup>+</sup>  | Ac <sub>1</sub> Hex <sub>9</sub> HexA <sub>1</sub>                   | 10 |         |                      | [M+K] <sup>+</sup>  | Ac <sub>2</sub> Hex <sub>14</sub> HexA <sub>2</sub> Pyr <sub>1</sub> | 16 |
| XGOS14  | 2118.12              | [M+H] <sup>+</sup>  | Ac <sub>3</sub> Hex <sub>10</sub> HexA <sub>2</sub>                  | 12 |         |                      | [M+K] <sup>+</sup>  | Ac <sub>4</sub> Hex <sub>15</sub> HexA <sub>1</sub>                  | 16 |
| XGOS15  | 2215.29              | [M+H] <sup>+</sup>  | Ac <sub>2</sub> Hex <sub>10</sub> HexA <sub>2</sub> Pyr <sub>2</sub> | 12 | XGOS24# | 2892.55              | [M+H] <sup>+</sup>  | Ac <sub>4</sub> Hex <sub>13</sub> HexA <sub>3</sub> Pyr <sub>1</sub> | 16 |
| XGOS16# | 2423.33              | [M+K] <sup>+</sup>  | Hex <sub>12</sub> HexA <sub>2</sub> Pyr <sub>1</sub>                 | 14 |         |                      | [M+H] <sup>+</sup>  | Ac <sub>6</sub> Hex <sub>14</sub> HexA <sub>2</sub>                  | 16 |
|         |                      | [M+K] <sup>+</sup>  | Ac <sub>2</sub> Hex <sub>13</sub> HexA <sub>1</sub>                  | 14 | XGOS25# | 2955.11              | [M+Na] <sup>+</sup> | Ac <sub>5</sub> Hex <sub>13</sub> HexA <sub>3</sub> Pyr <sub>1</sub> | 16 |
| XGOS17# | 2526.45              | [M+H] <sup>+</sup>  | Ac <sub>3</sub> Hex <sub>11</sub> HexA <sub>3</sub> Pyr <sub>1</sub> | 14 |         |                      | [M+H] <sup>+</sup>  | Ac <sub>3</sub> Hex <sub>13</sub> HexA <sub>4</sub>                  | 17 |
|         |                      | [M+H] <sup>+</sup>  | Ac <sub>3</sub> Hex <sub>12</sub> HexA <sub>2</sub>                  | 14 |         |                      | [M+H] <sup>+</sup>  | Hex <sub>14</sub> HexA <sub>3</sub> Pyr <sub>2</sub>                 | 17 |
| XGOS18# | 2540.35              | [M+H] <sup>+</sup>  | Ac <sub>5</sub> Hex <sub>11</sub> HexA <sub>3</sub>                  | 14 |         |                      | [M+H] <sup>+</sup>  | Ac <sub>2</sub> Hex <sub>15</sub> HexA <sub>2</sub> Pyr <sub>1</sub> | 17 |
|         |                      | [M+H] <sup>+</sup>  | Ac <sub>2</sub> Hex <sub>12</sub> HexA <sub>2</sub> Pyr <sub>2</sub> | 14 |         |                      | [M+H] <sup>+</sup>  | Ac <sub>4</sub> Hex <sub>16</sub> HexA <sub>1</sub>                  | 17 |
|         |                      | [M+H] <sup>+</sup>  | Ac <sub>4</sub> Hex <sub>13</sub> HexA <sub>1</sub> Pyr <sub>1</sub> | 14 |         |                      |                     |                                                                      |    |

Ac, acetyl group; Hex, hexose; HexA, glucuronic acid; Pyr, pyruvate group; #indicates different possible conformations for the same m/z ion.
